# Supplementary material for: A biodegradable injectable fluorescent polyurethane-oxidized dextran hydrogel for non-invasive monitoring
Source: Royal Society of Chemistry journal article supplement (doi:10.1039/d3tb01488f), 2023-01-01
Supplement: d3tb01488f1.pdf [file d3tb01488f1.pdf]

## Supporting Information

### A biodegradable injectable fluorescent polyurethane-oxidized dextran hydrogel for non-invasive monitoring

Xiao Wang<sup>a</sup>, Yangcen Ou<sup>a</sup>, Xiaofei Wang<sup>a</sup>, Lei Yuan<sup>a</sup>, Nan He<sup>a</sup>, Zhen Li<sup>a</sup>, Feng Luo<sup>\*a</sup>, Jiehua Li<sup>a</sup>,

Hong Tan<sup>a</sup>

<sup>a</sup> College of Polymer Science and Engineering, State Key Laboratory of Polymer Materials  
Engineering, Sichuan University, Chengdu 610065, China

#### Corresponding Author

\* E-mail addresses: [fengluo@scu.edu.cn](mailto:fengluo@scu.edu.cn)

## Supplementary Figures

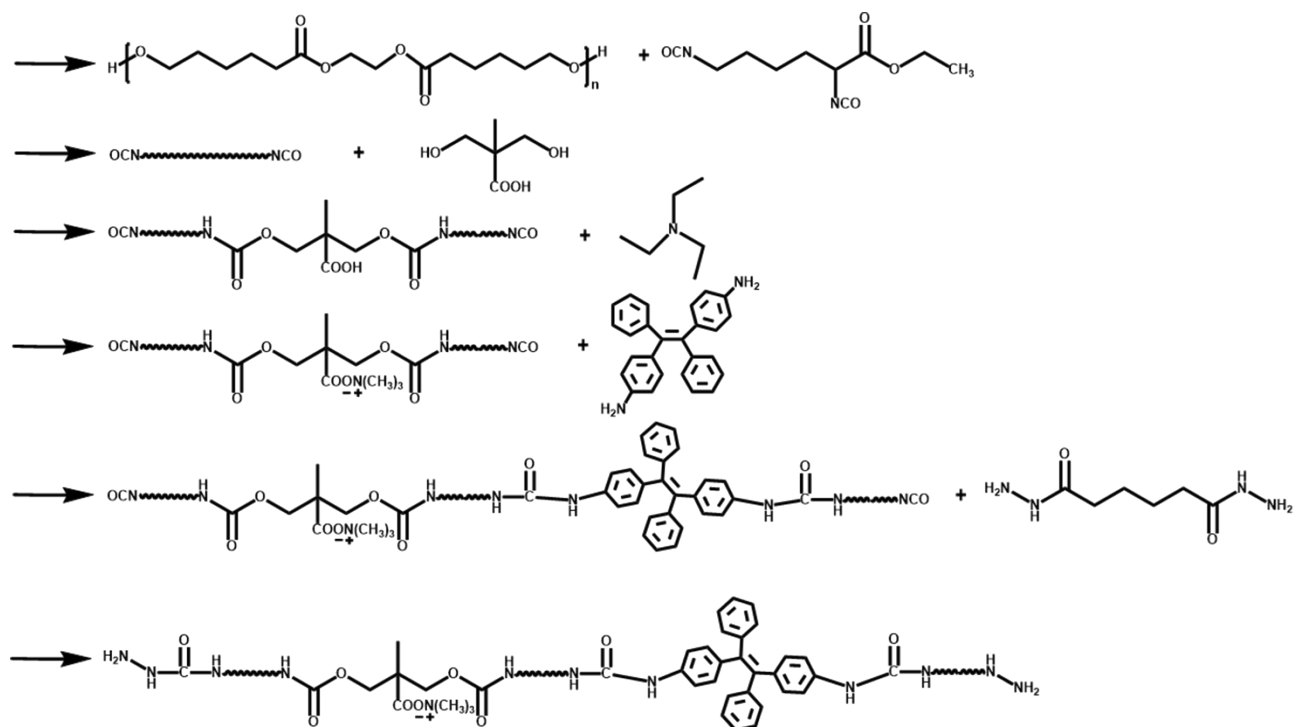

**Fig. S1.** Synthetic route of fluorescent PU.

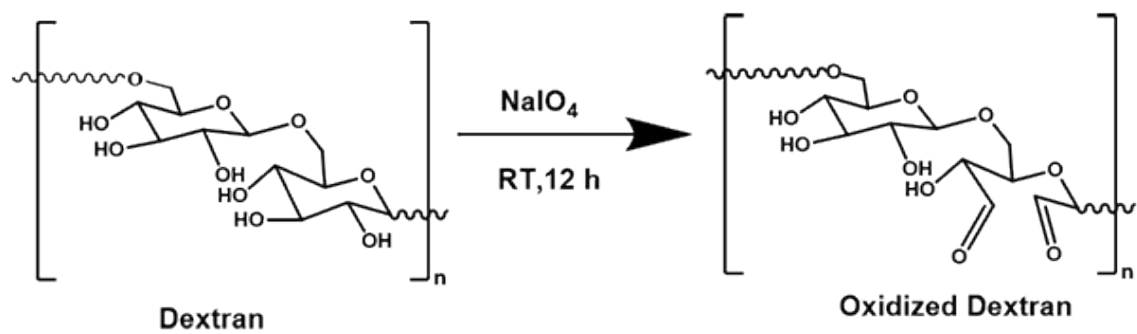

**Fig. S2.** Synthetic route of ODex.

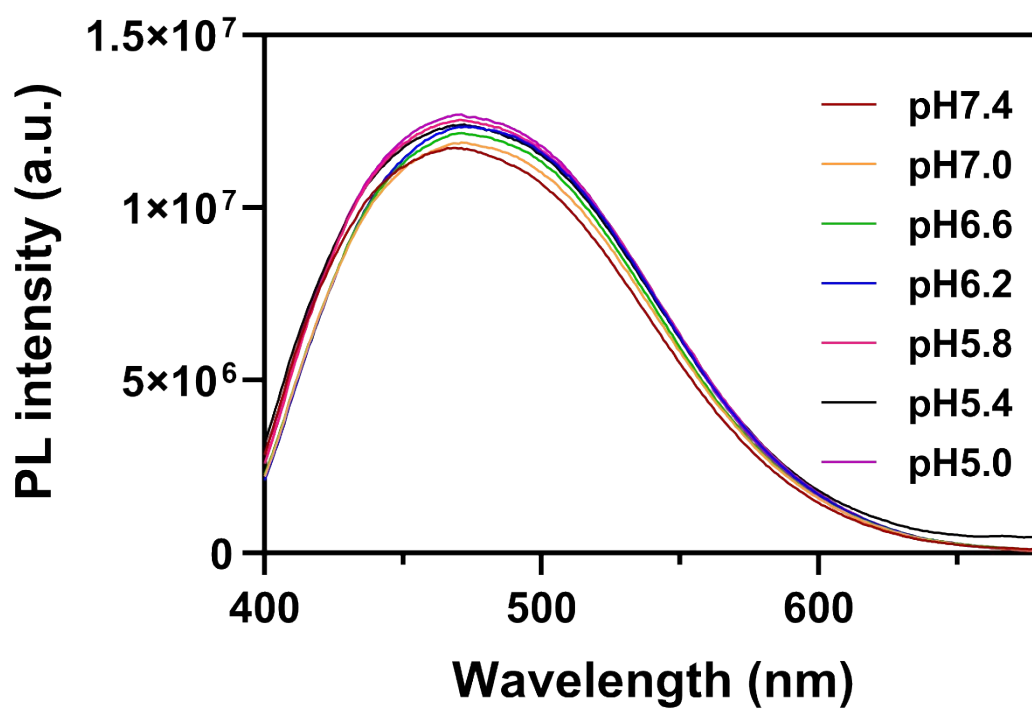

Fig. S3. Fluorescence emission spectra of PU at different pH.

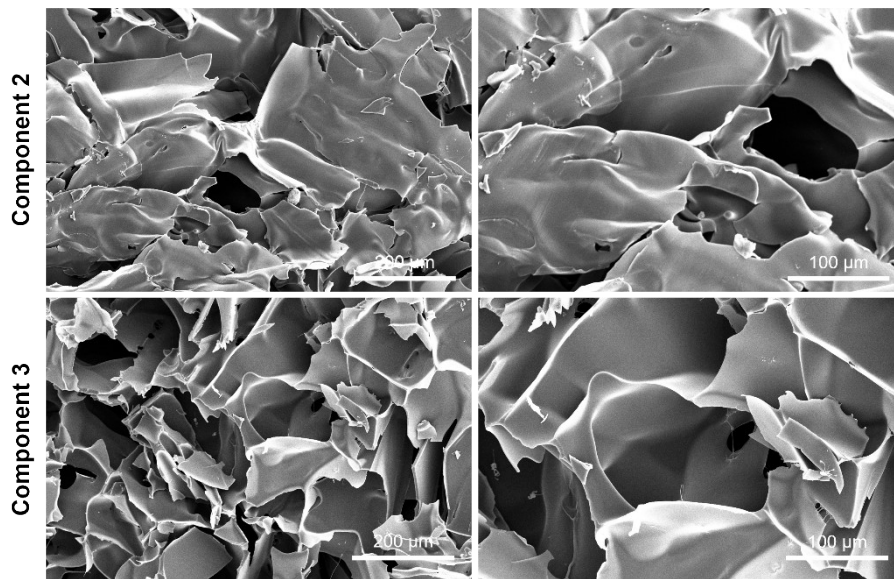

**Fig. S4.** SEM images of PU-OD hydrogels composed of groups number 2 and 3, as indicated in Table 2.
